# Supplementary material
Source: PubMed Central journal article supplement (PMC9362357)
Supplement: 41558_2022_1426_MOESM1_ESM.pdf [file 41558_2022_1426_MOESM1_ESM.pdf]

---

**Supplementary information**

---

**Over half of known human pathogenic diseases can be aggravated by climate change**

---

In the format provided by the authors and unedited

1 *Supplement 1. Caveats*

2 Our literature search yielded a much larger number of diseases that were aggravated, rather than  
3 diminished, by climatic hazards. This could reflect a real pattern about the impact of climatic  
4 hazards upon pathogenic diseases (i.e., climatic hazards make more diseases worse), but it may  
5 also reflect a publication bias. We minimized the risk of this pattern being driven by a search  
6 bias, by carrying out a literature review using search criteria that did not imply any preference  
7 for papers with positively or negatively impacted diseases and by scrutinizing titles, abstracts,  
8 and papers regardless of whether reported cases were positive or negative. However, we cannot  
9 fully rule out the possibility of a publication bias toward diseases that are aggravated by climate  
10 change, or simply, a lack of studies into diseases that have become less concerning due to  
11 climatic changes. This suggests that our description of diseases that have been diminished by  
12 climatic changes should be taken with caution.

13 The data collected as part of this review cannot be used to make inferences about the frequency  
14 and/or severity and/or pervasiveness with which climatic hazards affected specific diseases.  
15 First, the frequency with which papers cited specific links between hazards and diseases cannot  
16 be used as an indicator of the significance of such links, as the number of scientific papers is  
17 more likely related to novelty than to how frequent or pervasive the given links between hazards  
18 or diseases were. Second, it is possible that different papers documenting a given relationship  
19 may be based on the same underlying case; in other words, the redundancy in which links were  
20 reported by different scientific papers do not necessarily indicate that such a link is common. In  
21 short, our paper shows evidence for the linkages between hazards and diseases, but not how  
22 common or pervasive such links could be.

23 We used Google Scholar as our sole platform to search for publications. A likely issue with this  
24 choice is the extent to which Scholar may fail to contain papers available in other databases. This  
25 effect, however, is likely to be small. A study into this issue revealed that the broad nature of  
26 searches carried out using Scholar leads to 100% similarity of papers found on more topic-  
27 specific databases<sup>1</sup>. Some studies have suggested that Scholar by virtue of allowing free  
28 indexing to journals and having periodic searches of the web results in a higher number of  
29 relevant papers<sup>2</sup>. Another issue with Scholar relates to the way it ranks papers; Scholar ranks  
30 papers by “relevance” to the search query (i.e., extent to which the keywords are contained

31 within the full text of each document plus where it was published, who it was written by, as well  
32 as how often and how recently it has been cited in other scholarly literature); this ranking could  
33 prevent papers with case examples to appear on top of the returning papers for specific searches.  
34 To account for this issue, at each of the three level searches, we took random samples of the  
35 results from the pairs of keywords and scrutinized papers for case examples to identify the rank  
36 at which the paper appeared in the given Scholar search. In our first general search, all case  
37 examples appeared within the first 100 papers listed, in our second more specific search, papers  
38 with case examples appeared within the first page of results (i.e., ten papers); as a result, we  
39 looked over twice that number of papers at each of the two first searches to ensure that papers  
40 ranked lower by Scholar were also considered. As mentioned, we scrutinized >77, 000 titles and  
41 summaries. Failing to find case examples in papers ranked low by Scholar would be a problem  
42 only in the case that such a paper reported a case for which no other paper had previously  
43 reported that linkage between a hazard and a disease. To mitigate this problem, we carried out a  
44 third search of the literature looking for alternative disease names and taxonomic names for  
45 interactions for which we did not find case examples in the first two searches. This minimized  
46 the chance that data gaps resulted from searching over an insufficient number of papers. All  
47 searches were done in English, which certainly will prevent to find case examples that may exist  
48 in other languages.

49 There are some important caveats when considering our reported number of diseases aggravated  
50 by climate change and the number of pathways. There were a few instances in which different  
51 pathogens led to generally named diseases or symptoms. *Escherichia coli*, for instance, causes  
52 diarrhea but *E. coli* can also be associated with severe gastroenteritis, urinary tract infection, and  
53 respiratory illness; in turn, diarrhea can also be caused by other types of organisms. In such  
54 cases, where a pathogen could be associated with several generally named diseases, each  
55 pathogen name was considered independently. Most commonly, we also maintained the  
56 generally named disease to account for cases where the disease was reported but not the  
57 underlying pathogen. We found, for instance, several review papers looking into the impacts of  
58 floods on diarrhea hospitalizations which failed to report the specific pathogen (s) responsible for  
59 the disease. A key goal of this paper was to capture the diversity of human pathogens rather than  
60 simplifying a large umbrella of pathogens into a single disease name. Another caveat in our  
61 paper relates to the quantification of the number of unique pathways in which climatic hazards

62 triggered pathogenic diseases. In numerous case examples, the transmission type was not  
63 indicated (see Fig. 3), which could be due to the authors not knowing how the specific outbreak  
64 was caused, or outlining the transmission was not relevant to the goal of the given study, or the  
65 transmission pathway overall is not well known (e.g., contact vs. aerosol transmission in  
66 COVID-19, at least in the early phase of the pandemic), among other possibilities. As a result,  
67 our estimation of the number of pathways leading to outbreaks is a conservative quantification  
68 because we only counted cases in which the transmission was reported in the papers from which  
69 we took case examples.

70 A critical issue in our literature review relates to the attribution and magnitude, in which climatic  
71 hazards affected pathogenic diseases. Metcalf et al<sup>3</sup>. elegantly showed the numerous layers of  
72 environmental, social, economic, and body health variables related to the emergence of a  
73 pathogenic disease, and how such a comprehensive model remains elusive for any disease “often  
74 driven by data scarcity” and by the fact that interacting factors can be hard to disentangle with  
75 correlative analyses. As such, our goal was simply to identify cases in which climatic hazards  
76 were reported to have a role in pathogenic diseases, regardless of the magnitude by which the  
77 hazard was responsible for the disease. Case examples were classified to a specific disease and  
78 climatic hazard using exclusively the attribution provided in the paper; this was done to avoid  
79 any bias on our end. Most of the reported cases found in this review support the idea that while  
80 climatic hazards can critically affect the emergence of pathogenic diseases, they rarely acted  
81 alone. Thus, it should be safe to assume that climatic hazards play a role in the emergence of  
82 specific diseases, but their specific contribution will be difficult to quantify and will most likely  
83 vary in extent in different cases.

84

85 1. Gehanno, J.-F., Rollin, L. & Darmoni, S. Is the coverage of Google Scholar enough to be used  
86 alone for systematic reviews. *BMC medical informatics and decision making* **13**, 7 (2013).

87 2. Shariff, S. Z. *et al.* Retrieving clinical evidence: a comparison of PubMed and Google Scholar  
88 for quick clinical searches. *Journal of medical Internet research* **15**, e2624 (2013).

89 3. Metcalf, C. J. E. & Lessler, J. Opportunities and challenges in modeling emerging infectious  
90 diseases. *Science* **357**, 149–152 (2017).

91

92

93
